# Supplementary material for: The Mole Mapper Study, mobile phone skin imaging and melanoma risk data collected using ResearchKit
Source: PubMed Central journal article supplement (PMC5308198; doi:10.1038/sdata.2017.5), 2017-02-14
Supplement: sdata20175-s2.pdf [file sdata20175-s2.pdf]

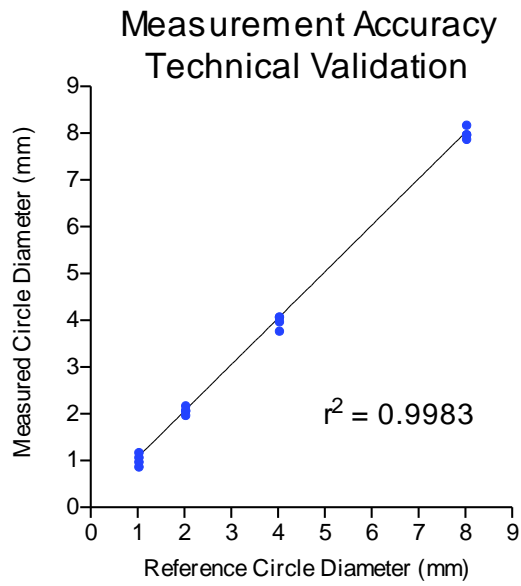

**Supplementary Figure 1:** Technical validation of mole measurement accuracy by plotting app-derived measurements of circles against the known diameters. Replicate measurements were made using multiple US coins as reference items
